# Supplementary material
Source: HighWire-hosted journal article supplement (https://oem.bmj.com/content/78/2/69)
Supplement: inline-supplementary-material-1 [file inline-supplementary-material-1.pdf]

## 1. Medline

| Interface: Ovid                                                                                                                                                                                                                                                                                                                                                                                                                                                                                                                                                                                                                                                                                                                                                                                                                                                                                                                                                                                                                                                                                                                                                                                                                                                                                                                                                                                                                                                                                                                                                                                                                                                                                                                                                                                                                                                                                                                                                                                                                                                                                                                                                                                                                                                                                                                                                                                                                                                                                                                                                                                                                                                                                                                                                                                       | Field labels                                                                                                                                                                                                                                                                                  |
|-------------------------------------------------------------------------------------------------------------------------------------------------------------------------------------------------------------------------------------------------------------------------------------------------------------------------------------------------------------------------------------------------------------------------------------------------------------------------------------------------------------------------------------------------------------------------------------------------------------------------------------------------------------------------------------------------------------------------------------------------------------------------------------------------------------------------------------------------------------------------------------------------------------------------------------------------------------------------------------------------------------------------------------------------------------------------------------------------------------------------------------------------------------------------------------------------------------------------------------------------------------------------------------------------------------------------------------------------------------------------------------------------------------------------------------------------------------------------------------------------------------------------------------------------------------------------------------------------------------------------------------------------------------------------------------------------------------------------------------------------------------------------------------------------------------------------------------------------------------------------------------------------------------------------------------------------------------------------------------------------------------------------------------------------------------------------------------------------------------------------------------------------------------------------------------------------------------------------------------------------------------------------------------------------------------------------------------------------------------------------------------------------------------------------------------------------------------------------------------------------------------------------------------------------------------------------------------------------------------------------------------------------------------------------------------------------------------------------------------------------------------------------------------------------------|-----------------------------------------------------------------------------------------------------------------------------------------------------------------------------------------------------------------------------------------------------------------------------------------------|
| <p>Comment: In Ovid, two or more words are automatically searched as phrases; i.e. no quotation marks are needed</p>                                                                                                                                                                                                                                                                                                                                                                                                                                                                                                                                                                                                                                                                                                                                                                                                                                                                                                                                                                                                                                                                                                                                                                                                                                                                                                                                                                                                                                                                                                                                                                                                                                                                                                                                                                                                                                                                                                                                                                                                                                                                                                                                                                                                                                                                                                                                                                                                                                                                                                                                                                                                                                                                                  | <ul style="list-style-type: none"> <li>• exp/ = exploded MeSH term</li> <li>• / = non exploded MeSH term</li> <li>• .ti,ab,kf. = title, abstract and author keywords</li> <li>• adjx = within x words, regardless of order</li> <li>• * = truncation of word for alternate endings</li> </ul> |
| <ol style="list-style-type: none"> <li>1. exp Administrative Personnel/ or exp Educational Personnel/ or exp Health Personnel/ or Social Workers/</li> <li>2. ((staff* or personnel* or employe* or profession* or practitioner* or provider* or technician* or worker*) adj3 (administrative or dental or emergenc* or education* or health* or hospital* or medical or nursing or paramedic* or school*)).ti,ab,kf.</li> <li>3. (audiologist* or clinician* or dentist* or dietician* or doula* or doctor* or health auxiliar* or health secretar* or midwife or midwives or nurse* or nutritionist* or occupational therapist* or optometrist* or pharmacist* or physician* or physical therapist* or psychologist* or school auxiliar* or school administrator* or school secretar* or social welfare worker* or social worker* or teacher*).ti,ab,kf.</li> <li>4. or/1-3</li> <li>5. exp Aggression/ or Exposure to Violence/ or exp Harassment, Non-Sexual/ or Physical Abuse/ or Sexual Harassment/ or Sex Offenses/ or Violence/ or Workplace Violence/</li> <li>6. ((brother* or clinician* or colleague* or employe* or family or families or father* or health care or healthcare or hospital* or inpatient* or manager* or mother* or next of kin or occupation* or parent* or patient* or personnel* or practitioner* or pupil* or relative* or outpatient* or school* or sibling* or sister* or staff* or student* or supervisor*) adj4 (abusive or aggression or aggressive behavior* or aggressive behaviour* or aggressive event* or assault* or bully* or harass* or harrass* or menace* or mobbing or physical* threat* or verbal* abuse* or verbal* threat* or violence* or violent)).ti,ab,kf.</li> <li>7. (((behavior or behaviour or emotional or non-violent or non-violence or physical* or psychological or social* or supervision*) adj3 (abus* or aggression* or exclusion* or maladaptive* or terror or tormenting or undermining)) and work*).ti,ab,kf.</li> <li>8. ((horizontal* or interpersonal* or lateral* or work*) adj4 (acts of intimidation* or abus* or aggress* or assault* or bully* or deviance* or harm or harass* or harrass* or hostilit* or humiliation* or incivilit* or menace* or mistreatment* or ostracism or mobbing or petty tyrann* or scapegoating or threat* or unwanted sexual advance* or unwanted sexual attention* or victim* or violence or violent)).ti,ab,kf.</li> <li>9. ((derailed or destructive* or Machiavellian* or toxic* or tyrannical*) adj3 leader*).ti,ab,kf.</li> <li>10. or/5-9</li> <li>11. 4 and 10</li> <li>12. exp Cohort Studies/</li> <li>13. (cohort* or follow up stud* or incidence stud* or longitudinal* or prospective* or retrospective*).ti,ab,kf.</li> <li>14. or/12-13</li> <li>15. 11 and 14</li> </ol> |                                                                                                                                                                                                                                                                                               |

16. 15 limit to yr=1990-Current
